# Supplementary material
Source: PubMed Central journal article supplement (PMC3584865)
Supplement: IAI.01278-12_zii999090043so1.pdf [file IAI.01278-12_zii999090043so1.pdf]

## SUPPLEMENTAL MATERIAL

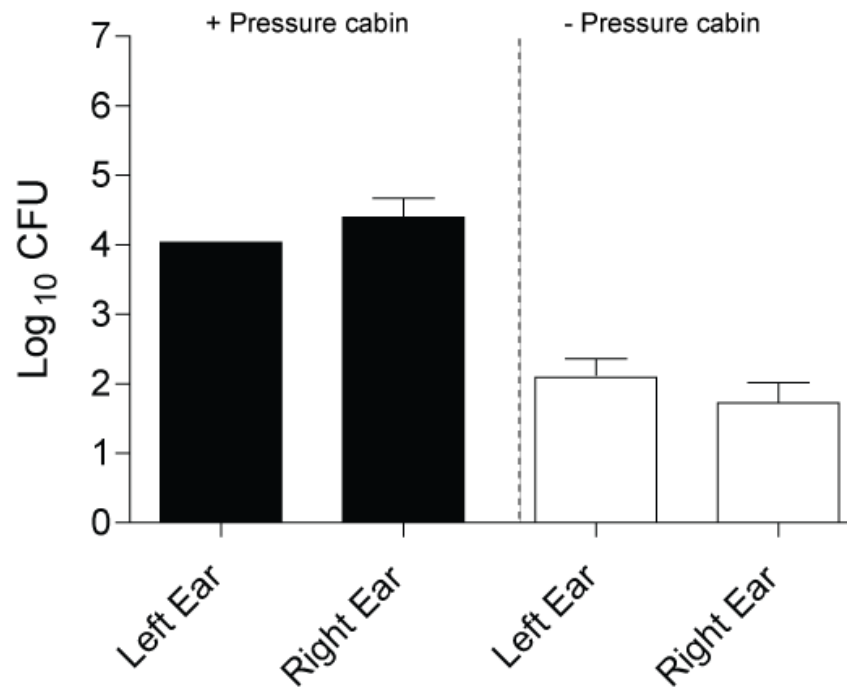

**Fig. S1. The pressure cabin delivers an intranasal inoculum to the middle ear.** Fourteen day old mice were administered  $10^6$  CFU of *S. pneumoniae* intranasally and then exposed to the pressure cabin as described in the materials and methods. Mice were then euthanized and the middle ears were collected for enumeration of bacterial load (“+ pressure cabin”). Alternatively, mice were administered *S. pneumoniae* intranasally in the absence of the pressure cabin and then euthanized for enumeration of bacterial load in the middle ear (“- pressure cabin”). Data shown represents the mean  $\pm$  SEM.

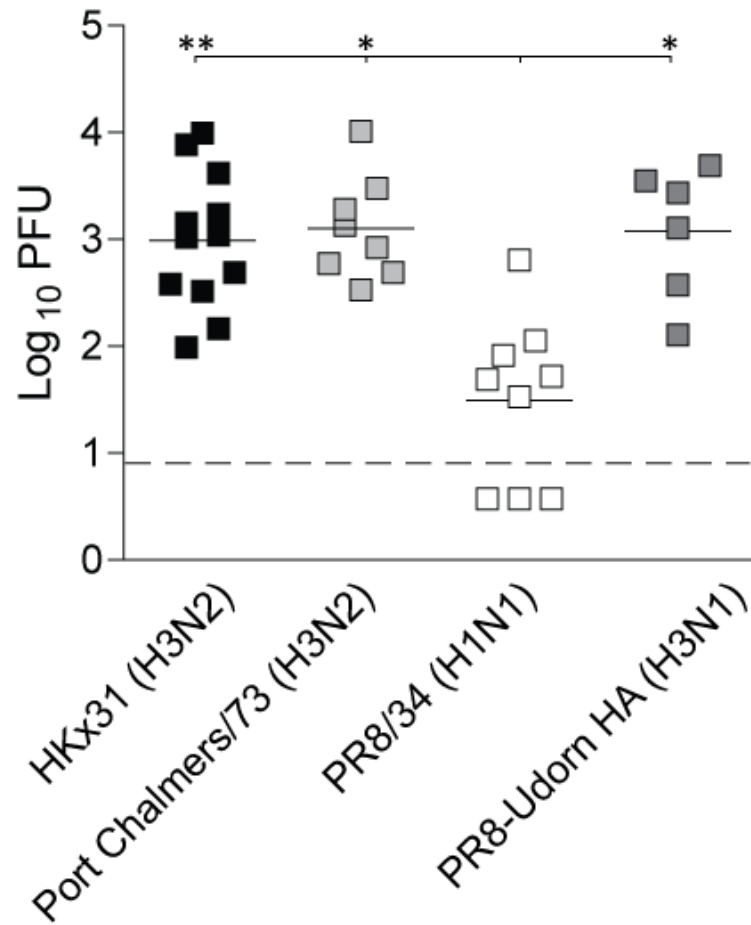

**Fig. S2. Titers of different IAV strains in the middle ears of mice six days post-intranasal IAV infection.** Viral titers are represented as the average of titers derived from the left and right ear of each mouse. Statistical significance was determined using a Mann-Whitney *U*-Test and Bonferroni post-test and was analyzed relative to PR8/34. Statistical significance is denoted by two asterisks ( $p < 0.01$ ) or one asterisk ( $p < 0.05$ ). Data are pooled from a minimum of two independent experiment and the dashed line indicates the detection limit of the assay.

**Table S1: Genes upregulated in the middle ears of Udorn/72 infected mice relative to Udorn-PR8 HA infected mice**

| <b>Sequence ID</b> | <b>Gene ID</b> | <b>Gene name</b> | <b>P value<br/>Udorn/Udorn-<br/>PR8 HA</b> | <b>Q value<br/>Udorn/Udorn-<br/>PR8 HA</b> | <b>Fold change<br/>Udorn/Udorn-<br/>PR8 HA</b> |
|--------------------|----------------|------------------|--------------------------------------------|--------------------------------------------|------------------------------------------------|
| AK002830           | 54123          | Irf7             | 0.000208                                   | 0.00948967                                 | 4.02                                           |
| BC018331           | 68774          | Ms4a6d           | 4.71E-09                                   | 2.57E-05                                   | 4.04                                           |
| BC044865           | 20558          | Slfn4            | 0.0000575                                  | 0.004373765                                | 4.08                                           |
| AK076430           | 17857          | Mx1              | 0.000108                                   | 0.006303825                                | 4.10                                           |
| AK159883           | 54123          | Irf7             | 0.000104                                   | 0.006194856                                | 4.14                                           |
| AK165065           | 16145          | Igtp             | 0.0000016                                  | 0.000728961                                | 4.15                                           |
| BC116911           | 50501          | Prok2            | 0.0000158                                  | 0.002214919                                | 4.15                                           |
| BC057889           | 12475          | Cd14             | 0.0000401                                  | 0.003517138                                | 4.17                                           |
| BC132518           | 20756          | Sprr2b           | 0.00215                                    | 0.03614913                                 | 4.17                                           |
| BC132100           | 331535         | Serpina7         | 0.000000319                                | 0.000327007                                | 4.17                                           |
| BC050835           | 15958          | Ifit2            | 0.0000359                                  | 0.003354665                                | 4.20                                           |
| BC096369           | 20531          | Slc34a2          | 0.00000307                                 | 0.001126244                                | 4.28                                           |
| AK152337           | 16145          | Igtp             | 0.00000308                                 | 0.001126244                                | 4.30                                           |
| BC132557           | 16145          | Igtp             | 0.00000257                                 | 0.000980283                                | 4.30                                           |
| DQ021879           | 17885          | Myh8             | 0.00133                                    | 0.02733603                                 | 4.31                                           |
| BC146444           | 408196         | Gm5416           | 0.00000838                                 | 0.001673554                                | 4.33                                           |
| NM_010846          | 17857          | Mx1              | 0.000073                                   | 0.005127701                                | 4.34                                           |
| XM_485980          | 434219         | Gm5598           | 0.00000108                                 | 0.000580779                                | 4.35                                           |
| U44731             | 55932          | Gbp3             | 0.0000193                                  | 0.002492529                                | 4.37                                           |
| BC019195           | 55932          | Gbp3             | 0.0000165                                  | 0.002255222                                | 4.40                                           |
| BC016101           | 64177          | Trpv6            | 8.26E-08                                   | 0.000175702                                | 4.40                                           |
| BC007143           | 100702         | Mpa2l            | 0.0000084                                  | 0.001673554                                | 4.41                                           |
| BC003768           | 15957          | Ifit1            | 0.0000738                                  | 0.005150806                                | 4.59                                           |

|              |        |               |             |             |      |
|--------------|--------|---------------|-------------|-------------|------|
| AK155452     | 56619  | Clec4e        | 0.0000888   | 0.005740566 | 4.67 |
| BC156163     | 20762  | Sprr2h        | 0.0000301   | 0.003010297 | 4.68 |
| BC052900     | 19225  | Ptgs2         | 0.000238    | 0.01021881  | 4.69 |
| BC066841     | 60533  | Cd274         | 0.00000529  | 0.001363384 | 4.73 |
| E01225       | N/A    | N/A           | 0.0000455   | 0.003807518 | 4.86 |
| AK088858     | 21822  | Tgtp          | 0.00000345  | 0.001154808 | 5.33 |
| BC057684     | 71898  | Apol9b        | 0.00000341  | 0.001154808 | 5.34 |
| BC114209     | 626578 | Gbp10         | 0.0000105   | 0.001841893 | 5.36 |
| BC057969     | 100702 | Mpa2l         | 0.00000467  | 0.001276593 | 5.37 |
| XM_905096    | 631323 | Gm12250       | 0.00000467  | 0.001276593 | 5.38 |
| BC020489     | 223672 | Apol9a        | 0.00000105  | 0.000574057 | 5.61 |
| BC112402     | 99899  | Ifi44         | 0.0000272   | 0.002845707 | 5.64 |
| BC002084     | 12992  | Csn1s2b       | 0.000178    | 0.00862229  | 5.67 |
| NM_001005858 | 667370 | I830012O16Rik | 0.0000111   | 0.001886611 | 5.80 |
| BC002085     | 14939  | Gzmb          | 0.0000045   | 0.001272539 | 5.81 |
| BC061126     | 20306  | Ccl7          | 3.86E-08    | 0.000126621 | 5.81 |
| BC034256     | 21822  | Tgtp          | 0.0000033   | 0.001154808 | 6.03 |
| BC058555     | 229898 | Gbp5          | 4.88E-08    | 0.000140507 | 6.05 |
| BC023105     | 667597 | BC023105      | 0.00000079  | 0.000498013 | 6.06 |
| BC117014     | 330122 | Cxcl3         | 0.000013    | 0.001974269 | 6.16 |
| BC003804     | 15959  | Ifit3         | 0.00000388  | 0.001210006 | 6.17 |
| AK150926     | 17474  | Clec4d        | 0.0000448   | 0.003807215 | 6.22 |
| NM_001101605 | 667373 | Gm14446       | 0.000029    | 0.002954329 | 6.24 |
| AK172047     | 60440  | Iigp1         | 0.000000456 | 0.000364401 | 6.35 |
| AK170692     | 17474  | Clec4d        | 0.0000513   | 0.004064749 | 6.36 |
| XM_001471581 | 667597 | BC023105      | 0.000000404 | 0.00034875  | 6.55 |
| AK155919     | 17474  | Clec4d        | 0.0000137   | 0.002061488 | 6.61 |
| BC003727     | 16175  | Il1a          | 0.000091    | 0.005807577 | 6.65 |
| BC004649     | 60440  | Iigp1         | 0.00000115  | 0.000608447 | 6.73 |

|           |        |               |             |             |        |
|-----------|--------|---------------|-------------|-------------|--------|
| BC003343  | 17329  | Cxcl9         | 5.14E-08    | 0.000140507 | 6.85   |
| AJ007971  | 60440  | Iigp1         | 0.000000148 | 0.000242744 | 6.87   |
| BC011336  | 14469  | Gbp2          | 6.63E-08    | 0.000158627 | 7.04   |
| BC020033  | 58203  | Zbp1          | 0.00000051  | 0.000364401 | 7.26   |
| BC117057  | 21926  | Tnf           | 0.0000255   | 0.002778124 | 7.45   |
| AK155874  | 20310  | Cxcl2         | 0.0000766   | 0.005213128 | 7.74   |
| BC032882  | 14469  | Gbp2          | 9.5E-09     | 3.46E-05    | 7.98   |
| BC024392  | 20311  | Cxcl5         | 0.00000207  | 0.000859528 | 8.10   |
| AK152620  | 667370 | I830012O16Rik | 0.00000168  | 0.000744722 | 8.24   |
| AK149459  | 331535 | Serpina7      | 0.000000818 | 0.000498013 | 8.88   |
| BC042532  | 16181  | Il1rn         | 7.75E-10    | 6.36E-06    | 9.87   |
| AK030414  | 229898 | Gbp5          | 0.000000384 | 0.00034875  | 10.17  |
| AK171037  | 16181  | Il1rn         | 5.73E-09    | 2.57E-05    | 10.47  |
| BC003218  | 56619  | Clec4e        | 0.000000485 | 0.000364401 | 10.65  |
| BC111443  | 20302  | Ccl3          | 8.57E-08    | 0.000175702 | 10.92  |
| BC120715  | 80885  | Niacr1        | 0.00000149  | 0.00070836  | 11.83  |
| BC040425  | 226695 | Ifi205        | 1.9E-09     | 1.25E-05    | 12.26  |
| BC119257  | 20303  | Ccl4          | 0.000000175 | 0.000243501 | 14.72  |
| XM_127883 | 16365  | Irg1          | 0.00000135  | 0.000670975 | 14.73  |
| BC011437  | 16176  | Il1b          | 0.000000244 | 0.000287311 | 16.87  |
| AK224980  | 16176  | Il1b          | 0.000000169 | 0.000243501 | 17.68  |
| BC030067  | 15945  | Cxcl10        | 2.77E-10    | 3.03E-06    | 17.93  |
| BC119511  | 20310  | Cxcl2         | 0.000000108 | 0.000202287 | 23.86  |
| BC055885  | 20210  | Saa3          | 0.00000851  | 0.001673554 | 24.41  |
| BC049931  | 15930  | Ido1          | 1.35E-11    | 4.43E-07    | 27.33  |
| AK089891  | 16365  | Irg1          | 3.52E-11    | 5.77E-07    | 158.98 |

---

**Table S2: Genes downregulated in the middle ears of Udorn/72 infected mice relative to Udorn-PR8 HA infected mice**

| <b>Sequence ID</b> | <b>Gene ID</b> | <b>Gene name</b> | <b>P value<br/>Udorn/Udorn-<br/>PR8 HA</b> | <b>Q value<br/>Udorn/Udorn-<br/>PR8 HA</b> | <b>Fold change<br/>Udorn/Udorn-<br/>PR8 HA</b> |
|--------------------|----------------|------------------|--------------------------------------------|--------------------------------------------|------------------------------------------------|
| BC065108           | 56410          | Cbln3            | 0.000518                                   | 0.01594003                                 | 0.198395118                                    |
| BC094611           | 18012          | Neurod1          | 0.000637                                   | 0.01805735                                 | 0.203279257                                    |
| BC072635           | 268934         | Grm4             | 0.000387                                   | 0.01349081                                 | 0.239306405                                    |
| BC058965           | 18013          | Neurod2          | 0.0000275                                  | 0.002845707                                | 0.241170958                                    |
| BC018241           | 18012          | Neurod1          | 0.00359                                    | 0.0491091                                  | 0.242510915                                    |
| XM_001476613       | 100041343      | Gm3282           | 0.000000179                                | 0.000243501                                | 0.243253872                                    |

**Table S3: Statistical analysis (Kruskal-Wallis test accompanied by Dunn's multiple comparisons test) of middle ear inflammation induced by different IAV strains**

| <b>IAV strains</b>                               | <b>Significant?</b> |
|--------------------------------------------------|---------------------|
| PUHA (H3N1) vs. PR8- HKx31 HA (H3N1)             | No <sup>a</sup>     |
| PUHA (H3N1) vs. Udorn-PR8 NA (H3N1)              | No                  |
| PUHA (H3N1) vs. PR8 (H1N1)                       | Yes <sup>b</sup>    |
| PUHA (H3N1) vs. HKx31 (H3N2)                     | No                  |
| PUHA (H3N1) vs. Udorn (H3N2)                     | No                  |
| PUHA (H3N1) vs. Udorn-PR8 HA (H1N2)              | Yes                 |
| PUHA (H3N1) vs. PR8 HKx31 NA (H1N2)              | Yes                 |
| PUHA (H3N1) vs. PR8-Auck HA (H1N1)               | Yes                 |
| PUHA (H3N1) vs. PR8-Udorn NA (H1N2)              | Yes                 |
| PUHA (H3N1) vs. Port Chalmers/73 (H3N2)          | No                  |
| PR8- HKx31 HA (H3N1) vs. Udorn-PR8 NA (H3N1)     | No                  |
| PR8- HKx31 HA (H3N1) vs. PR8 (H1N1)              | Yes                 |
| PR8- HKx31 HA (H3N1) vs. HKx31 (H3N2)            | No                  |
| PR8- HKx31 HA (H3N1) vs. Udorn (H3N2)            | No                  |
| PR8- HKx31 HA (H3N1) vs. Udorn-PR8 HA (H1N2)     | Yes                 |
| PR8- HKx31 HA (H3N1) vs. PR8 HKx31 NA (H1N2)     | Yes                 |
| PR8- HKx31 HA (H3N1) vs. PR8-Auck HA (H1N1)      | Yes                 |
| PR8- HKx31 HA (H3N1) vs. PR8-Udorn NA (H1N2)     | Yes                 |
| PR8- HKx31 HA (H3N1) vs. Port Chalmers/73 (H3N2) | No                  |
| Udorn-PR8 NA (H3N1) vs. PR8 (H1N1)               | Yes                 |
| Udorn-PR8 NA (H3N1) vs. HKx31 (H3N2)             | No                  |
| Udorn-PR8 NA (H3N1) vs. Udorn (H3N2)             | No                  |
| Udorn-PR8 NA (H3N1) vs. Udorn-PR8 HA (H1N2)      | Yes                 |
| Udorn-PR8 NA (H3N1) vs. PR8 HKx31 NA (H1N2)      | No                  |
| Udorn-PR8 NA (H3N1) vs. PR8-Auck HA (H1N1)       | No                  |
| Udorn-PR8 NA (H3N1) vs. PR8-Udorn NA (H1N2)      | Yes                 |
| Udorn-PR8 NA (H3N1) vs. Port Chalmers/73 (H3N2)  | No                  |
| PR8 (H1N1) vs. HKx31 (H3N2)                      | Yes                 |
| PR8 (H1N1) vs. Udorn (H3N2)                      | Yes                 |
| PR8 (H1N1) vs. Udorn-PR8 HA (H1N2)               | No                  |
| PR8 (H1N1) vs. PR8 HKx31 NA (H1N2)               | No                  |
| PR8 (H1N1) vs. PR8-Auck HA (H1N1)                | No                  |
| PR8 (H1N1) vs. PR8-Udorn NA (H1N2)               | No                  |
| PR8 (H1N1) vs. Port Chalmers/73 (H3N2)           | No                  |
| HKx31 (H3N2) vs. Udorn (H3N2)                    | No                  |
| HKx31 (H3N2) vs. Udorn-PR8 HA (H1N2)             | Yes                 |
| HKx31 (H3N2) vs. PR8 HKx31 NA (H1N2)             | Yes                 |
| HKx31 (H3N2) vs. PR8-Auck HA (H1N1)              | No                  |
| HKx31 (H3N2) vs. PR8-Udorn NA (H1N2)             | Yes                 |
| HKx31 (H3N2) vs. Port Chalmers/73 (H3N2)         | No                  |
| Udorn (H3N2) vs. Udorn-PR8 HA (H1N2)             | Yes                 |
| Udorn (H3N2) vs. PR8 HKx31 NA (H1N2)             | Yes                 |
| Udorn (H3N2) vs. PR8-Auck HA (H1N1)              | Yes                 |
| Udorn (H3N2) vs. PR8-Udorn NA (H1N2)             | Yes                 |

|                                                 |     |
|-------------------------------------------------|-----|
| Udorn (H3N2) vs. Port Chalmers/73 (H3N2)        | No  |
| Udorn-PR8 HA (H1N2) vs. PR8 HKx31 NA (H1N2)     | No  |
| Udorn-PR8 HA (H1N2) vs. PR8-Auck HA (H1N1)      | No  |
| Udorn-PR8 HA (H1N2) vs. PR8-Udorn NA (H1N2)     | No  |
| Udorn-PR8 HA (H1N2) vs. Port Chalmers/73 (H3N2) | No  |
| PR8 HKx31 NA (H1N2) vs. PR8-Auck HA (H1N1)      | No  |
| PR8 HKx31 NA (H1N2) vs. PR8-Udorn NA (H1N2)     | No  |
| PR8 HKx31 NA (H1N2) vs. Port Chalmers/73 (H3N2) | No  |
| PR8-Auck HA (H1N1) vs. PR8-Udorn NA (H1N2)      | No  |
| PR8-Auck HA (H1N1) vs. Port Chalmers/73 (H3N2)  | No  |
| PR8-Udorn NA (H1N2) vs. Port Chalmers/73 (H3N2) | Yes |

---

<sup>a</sup>  $p \geq 0.05$

<sup>b</sup>  $p < 0.05$
